# Supplementary material
Source: Springer Nature journal article supplement (https://www.springermedizin.de/resource/supplementary/12914_2009_76_MOESM1_ESM.pdf/9537462)

## % NHIS card-holders, by region, 2005 & 2008

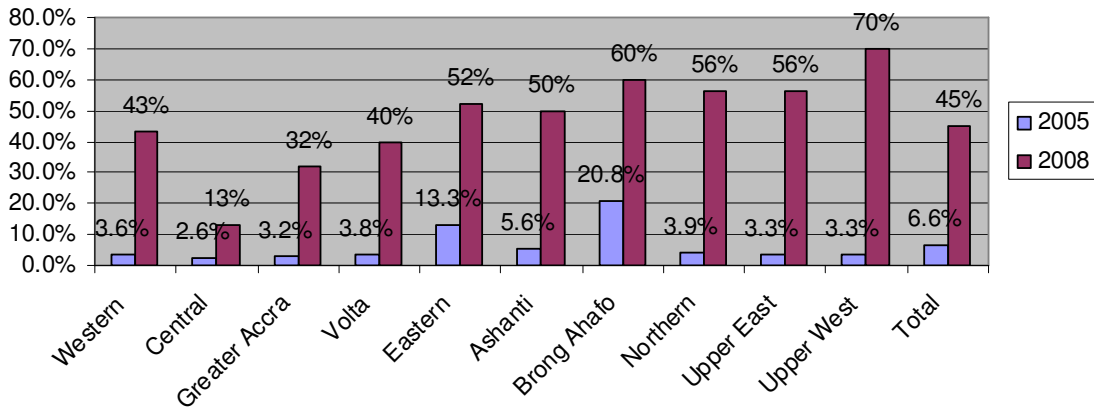

Supplement: MOESM1 [file 9537462]
